# Supplementary material
Source: publisher site journal article supplement (https://www.dovepress.com/article/389336)
Supplement: Supplementary file 1 [file get_supplementary_file.php]

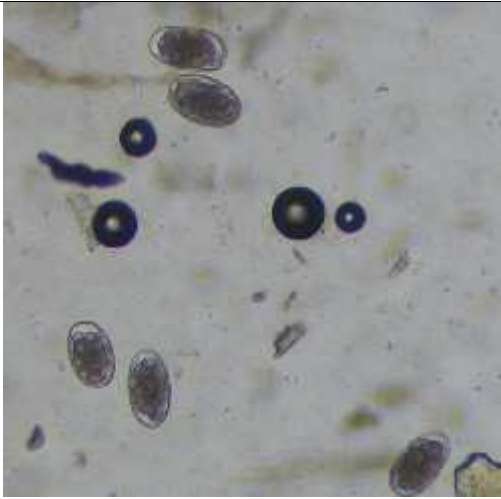

**Supplementary figure S1 A**

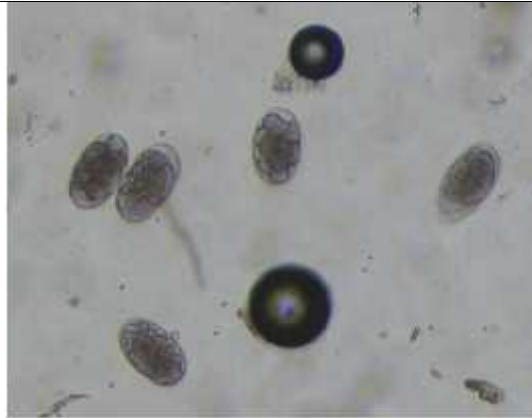

**Supplementary figure S1 B**

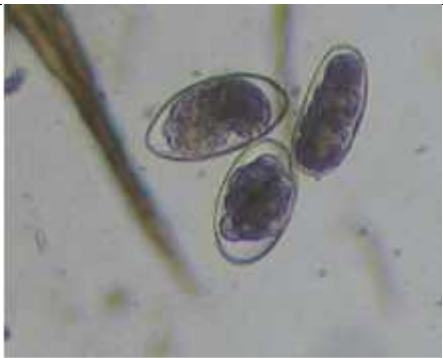

**Supplementary figure S1 C**

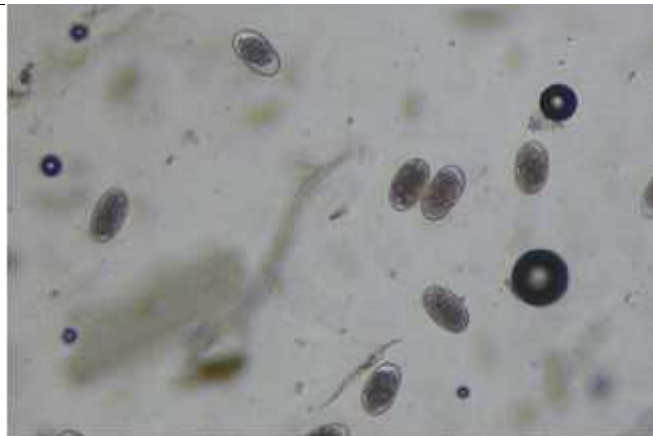

**Supplementary figure S1 D**

**Supplementary figure S1: Eggs of strongyle-type nematodes**

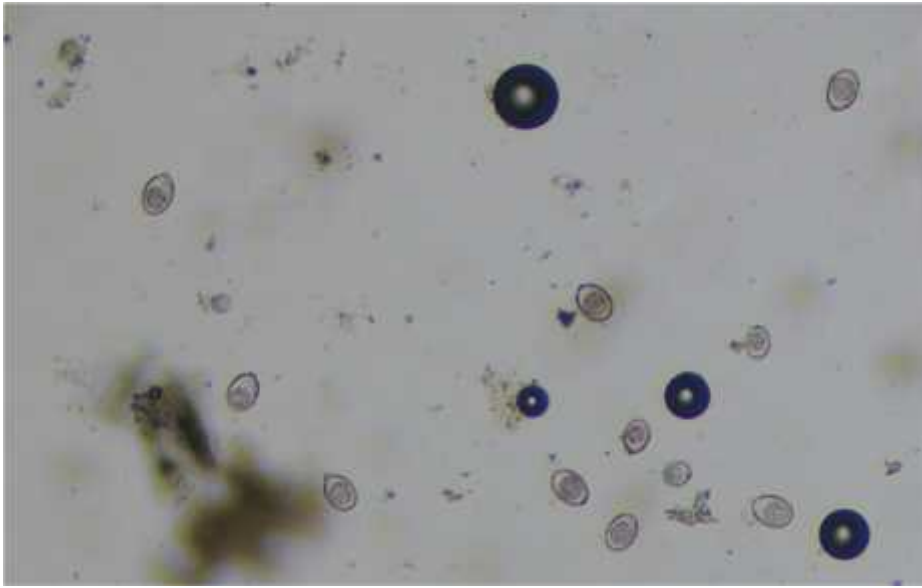

**Supplementary figure S2: Coccidian oocytes**

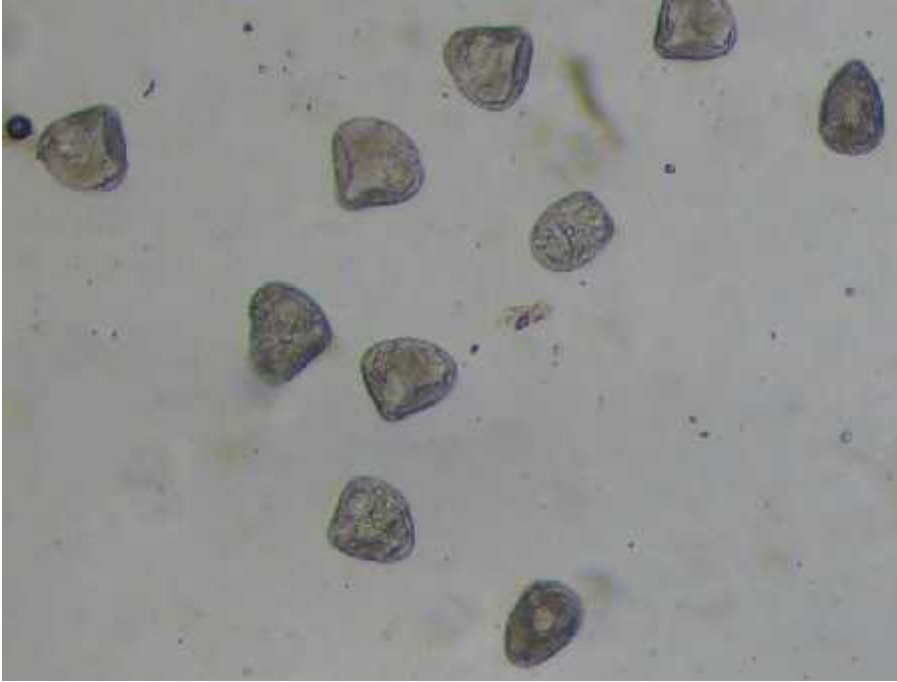

**Supplementary figure S3: Eggs of *Moniezia* spp**

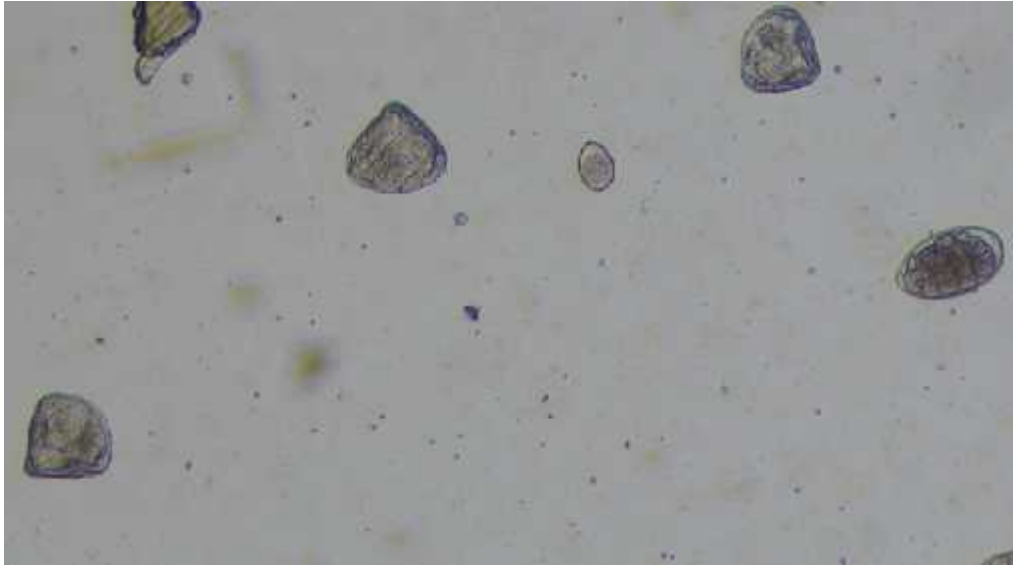

**Supplementary figure S4: Eggs of *Moniezia* spp, a coccidian oocyte and a strongyle-type nematode egg**

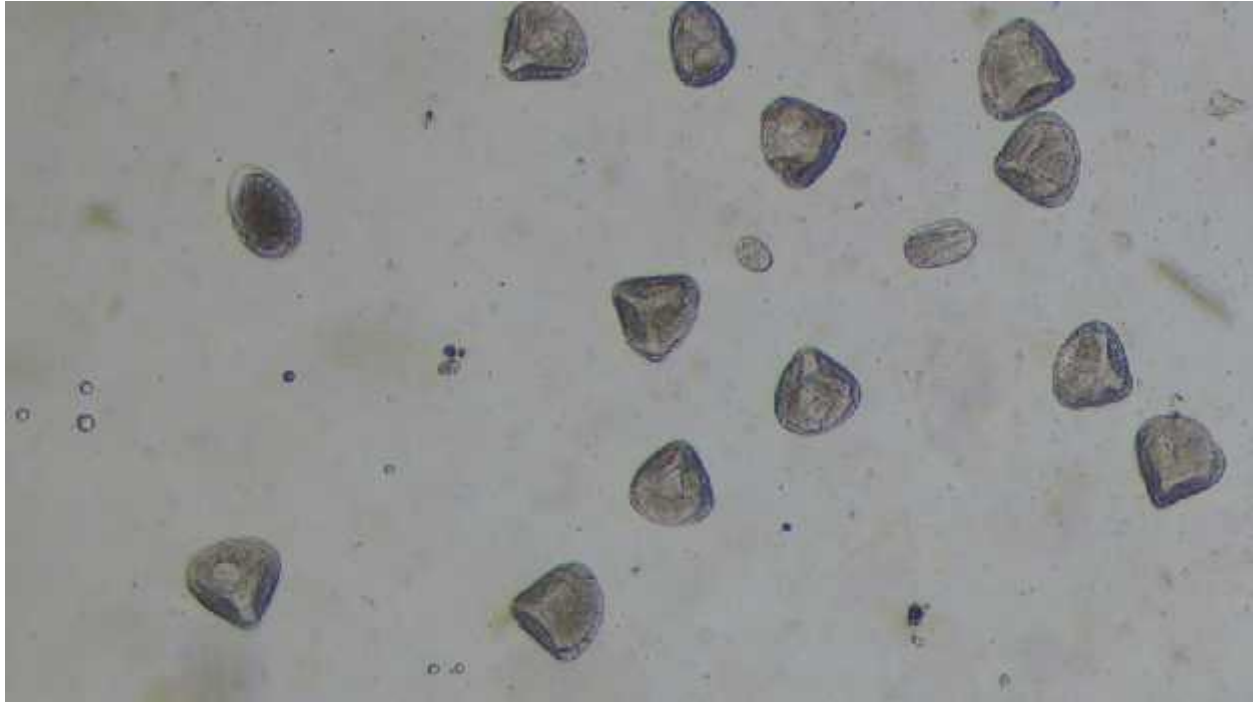

**Supplementary figure S5: Eggs of *Moniezia* spp, a strongyle-type nematode egg, a coccidian oocyte and an egg of *Strongyloides papillosus***
